# Supplementary material
Source: publisher figshare collection journal article supplement (https://gsajournals.figshare.com/articles/dataset/_/12233630)

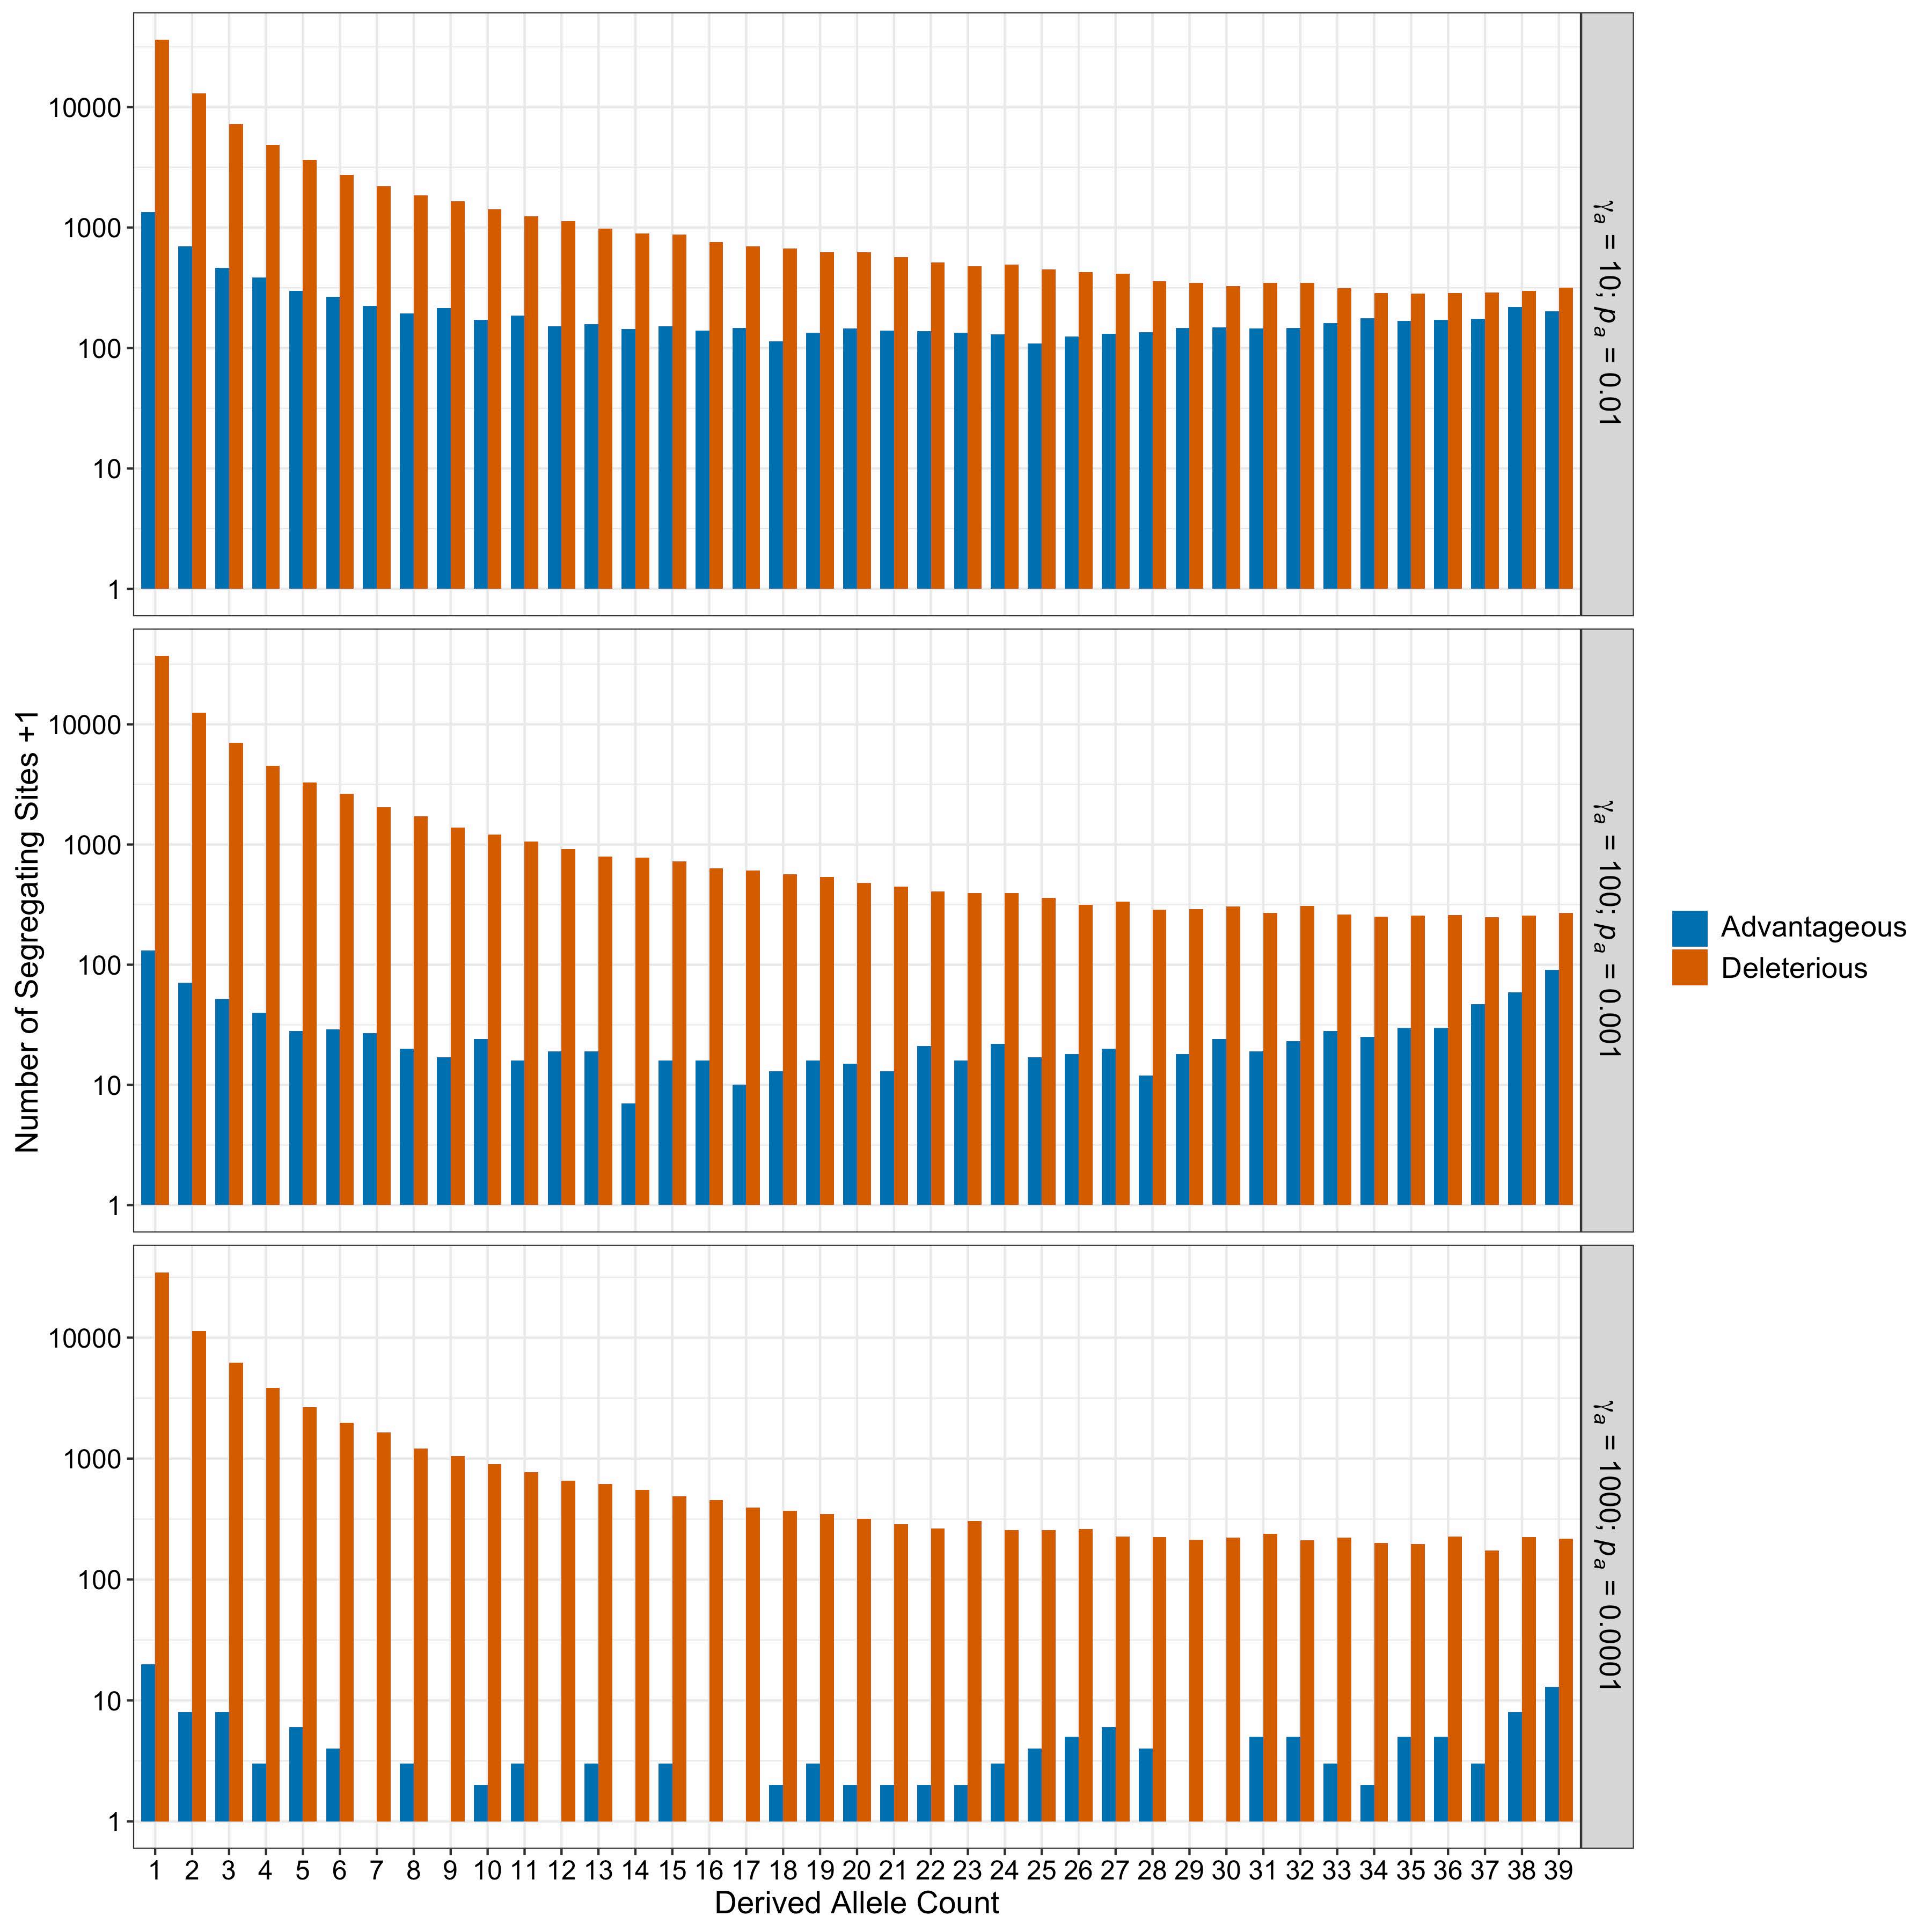

Supplement: Supplementary file 1 [file 1]

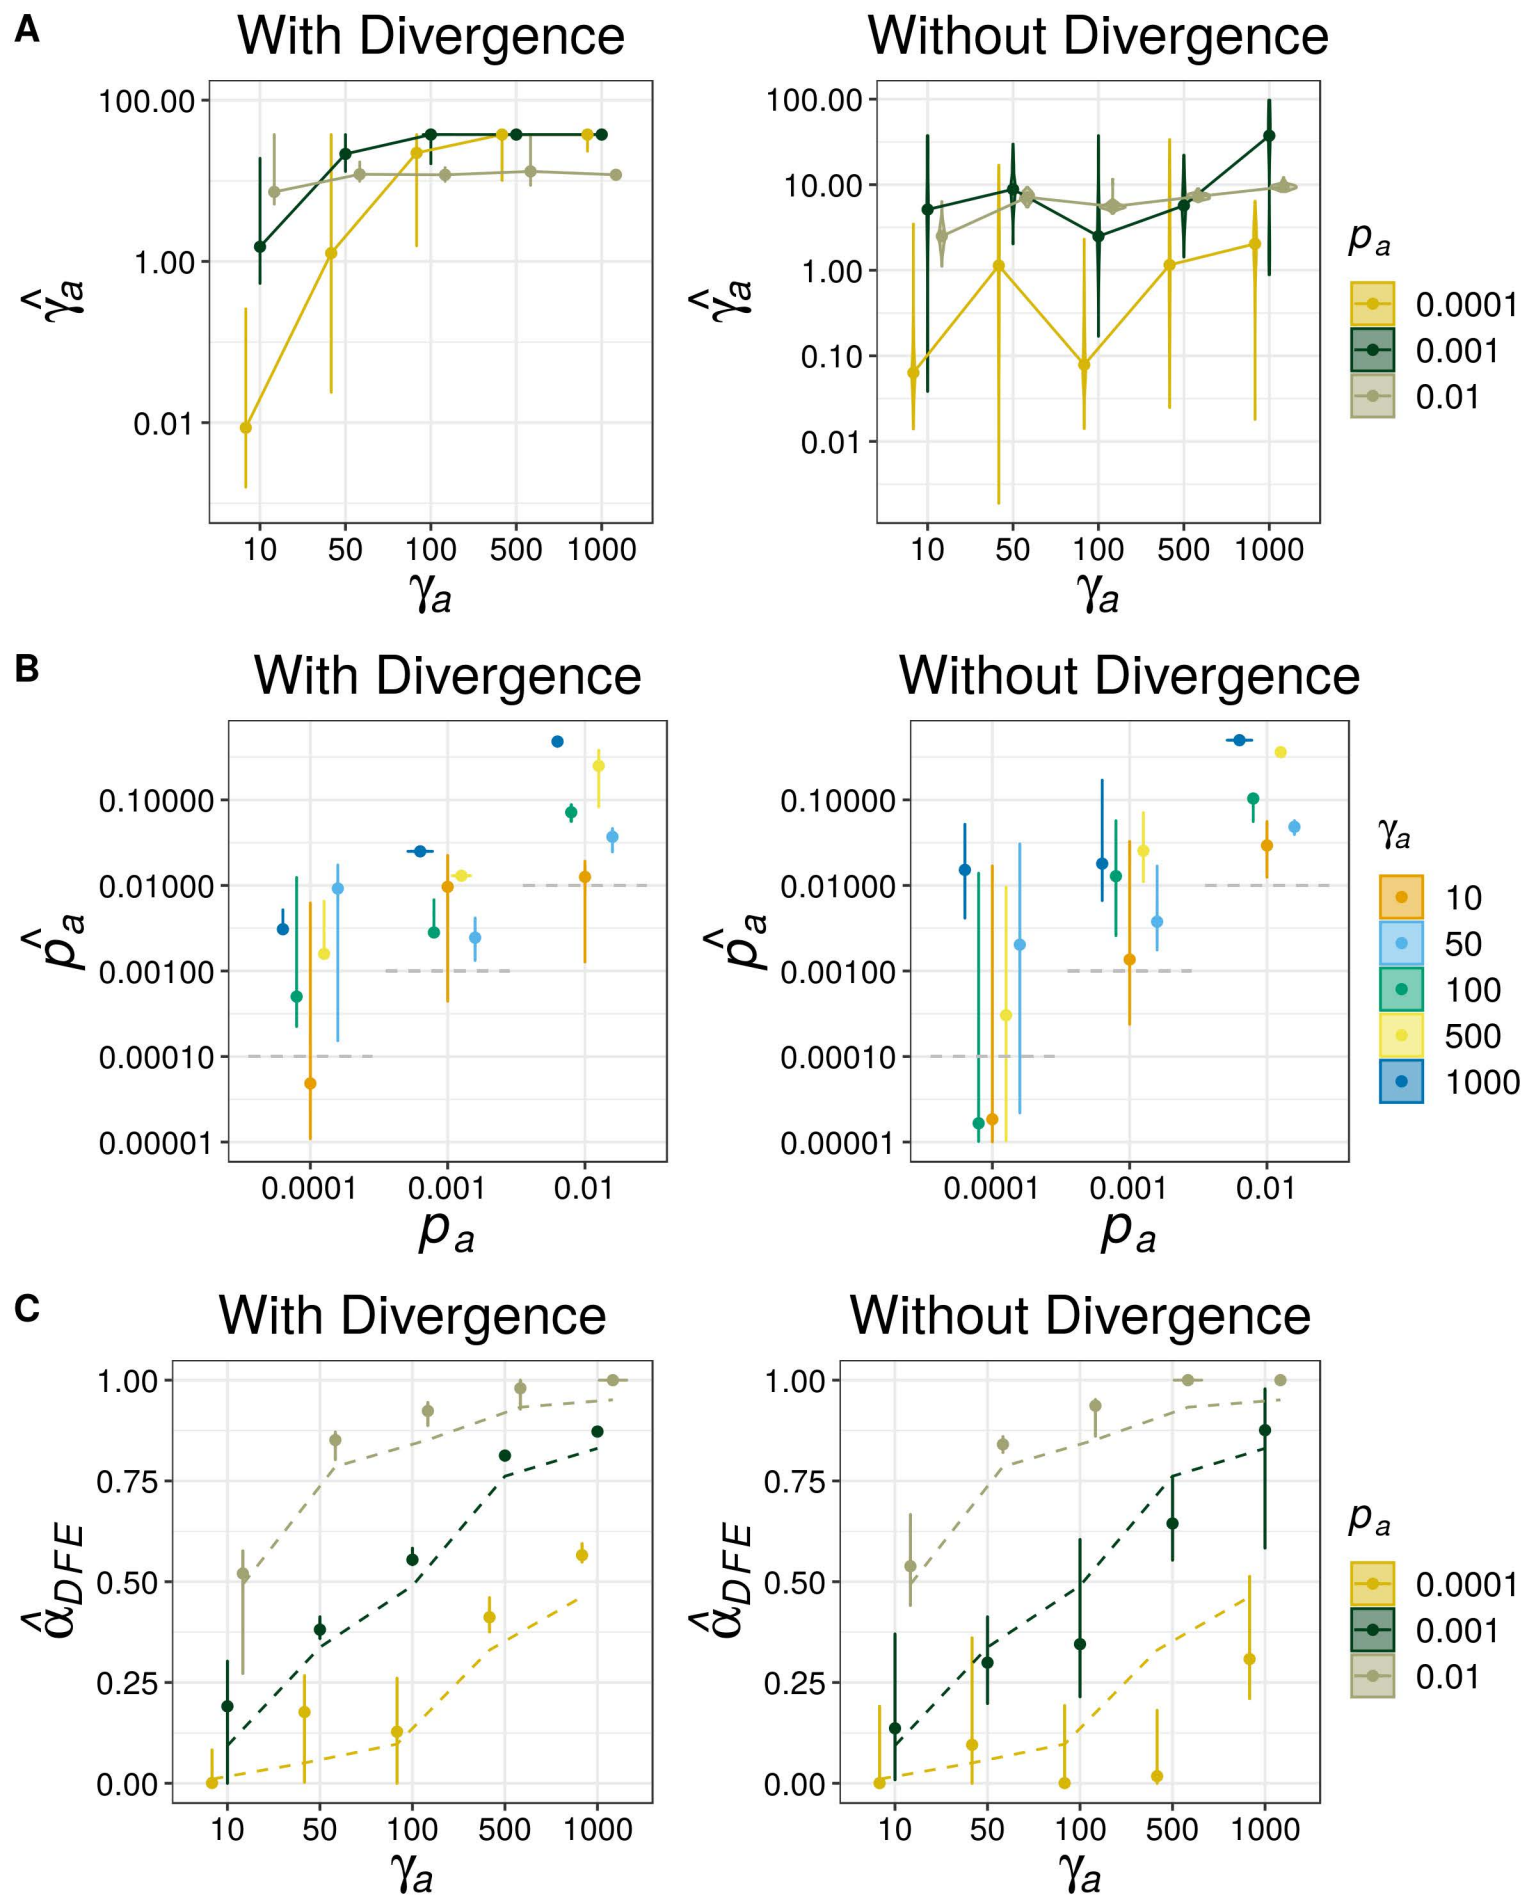

Supplement: Supplementary file 2 [file 1]

**A**

Expected Number of Segregating Sites

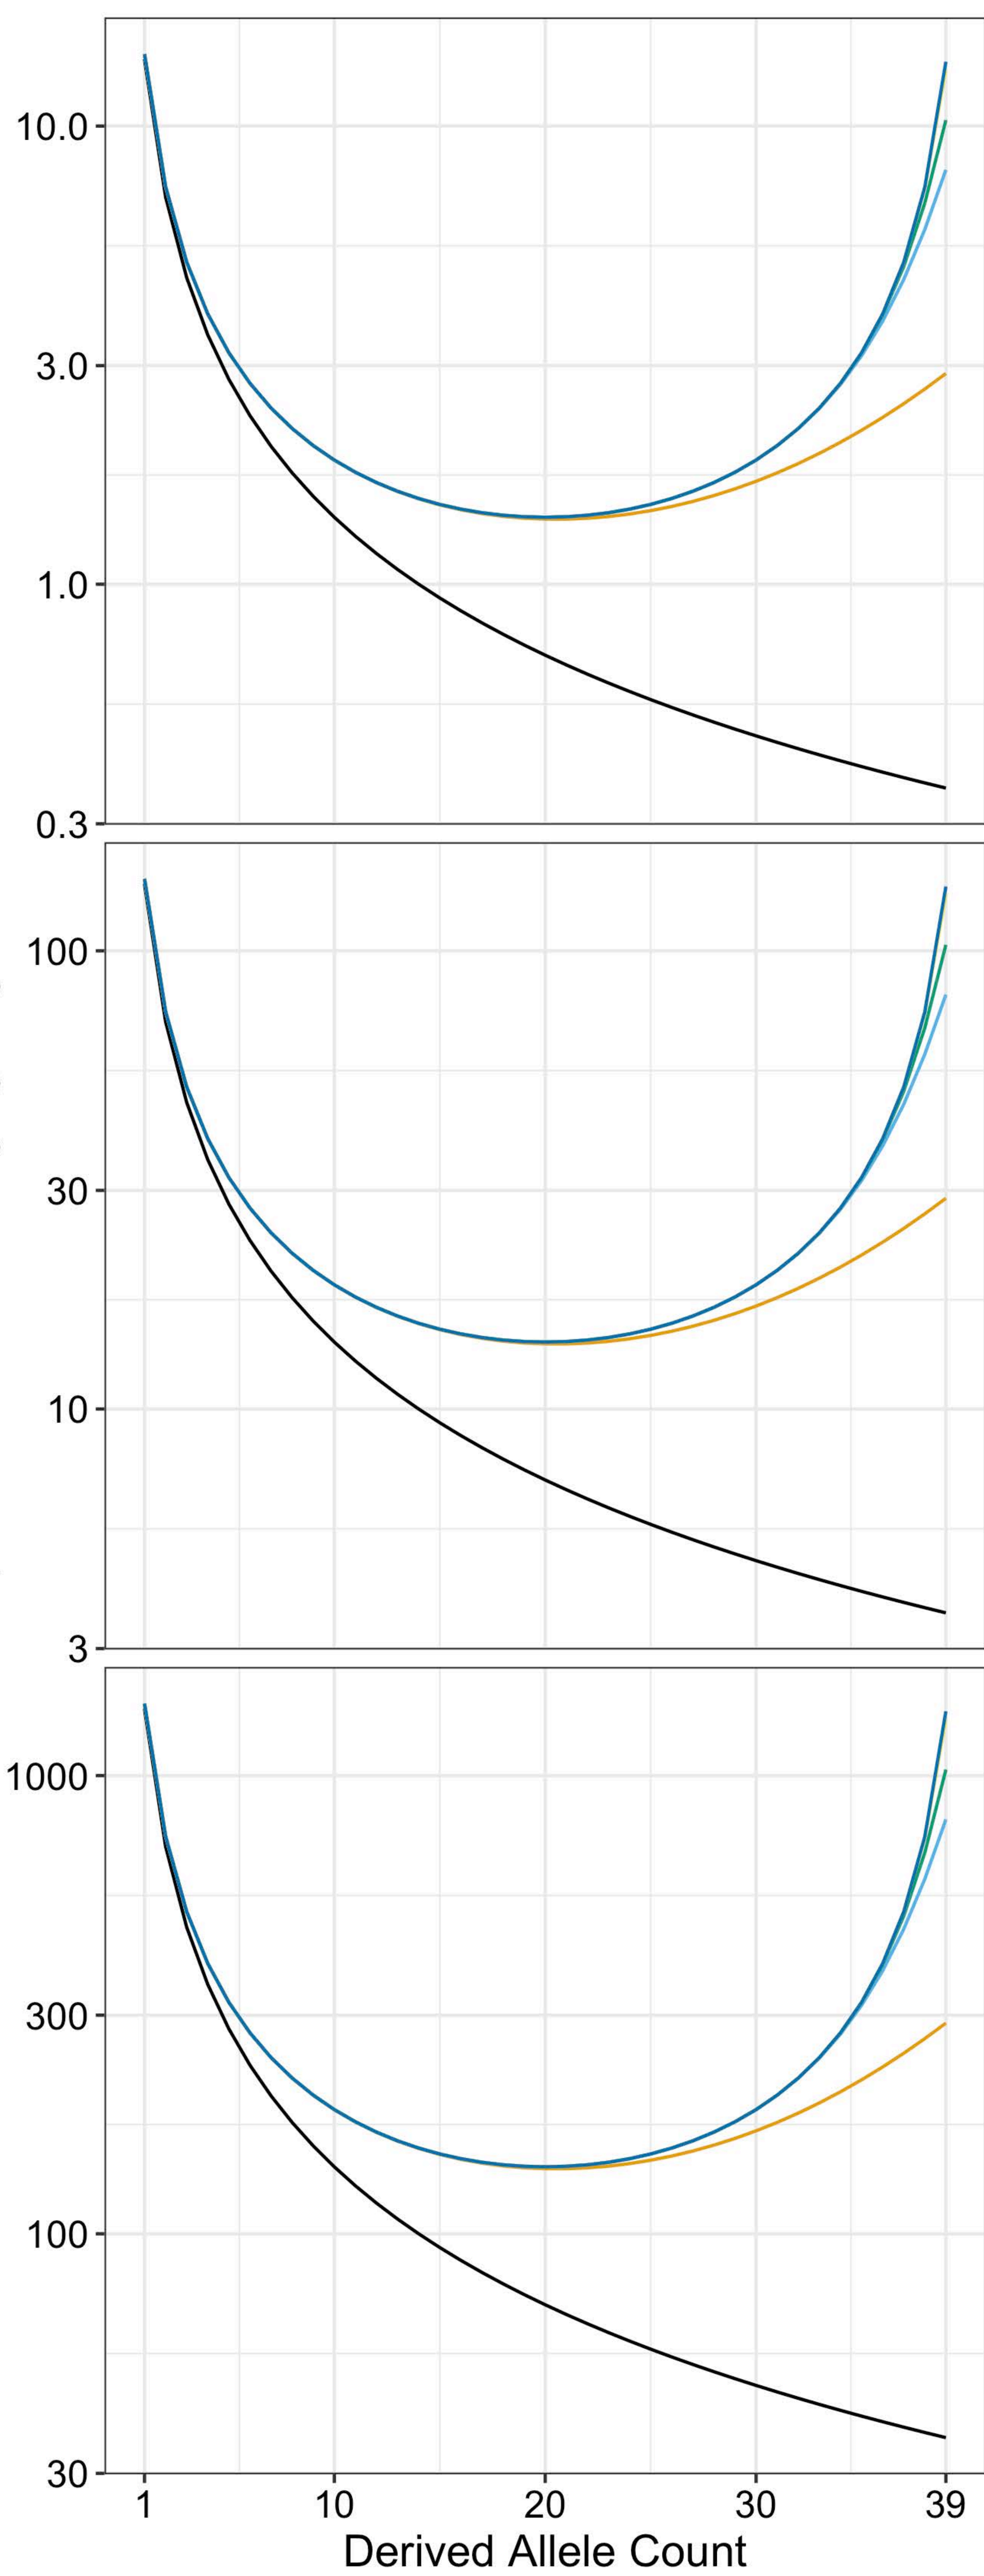**B**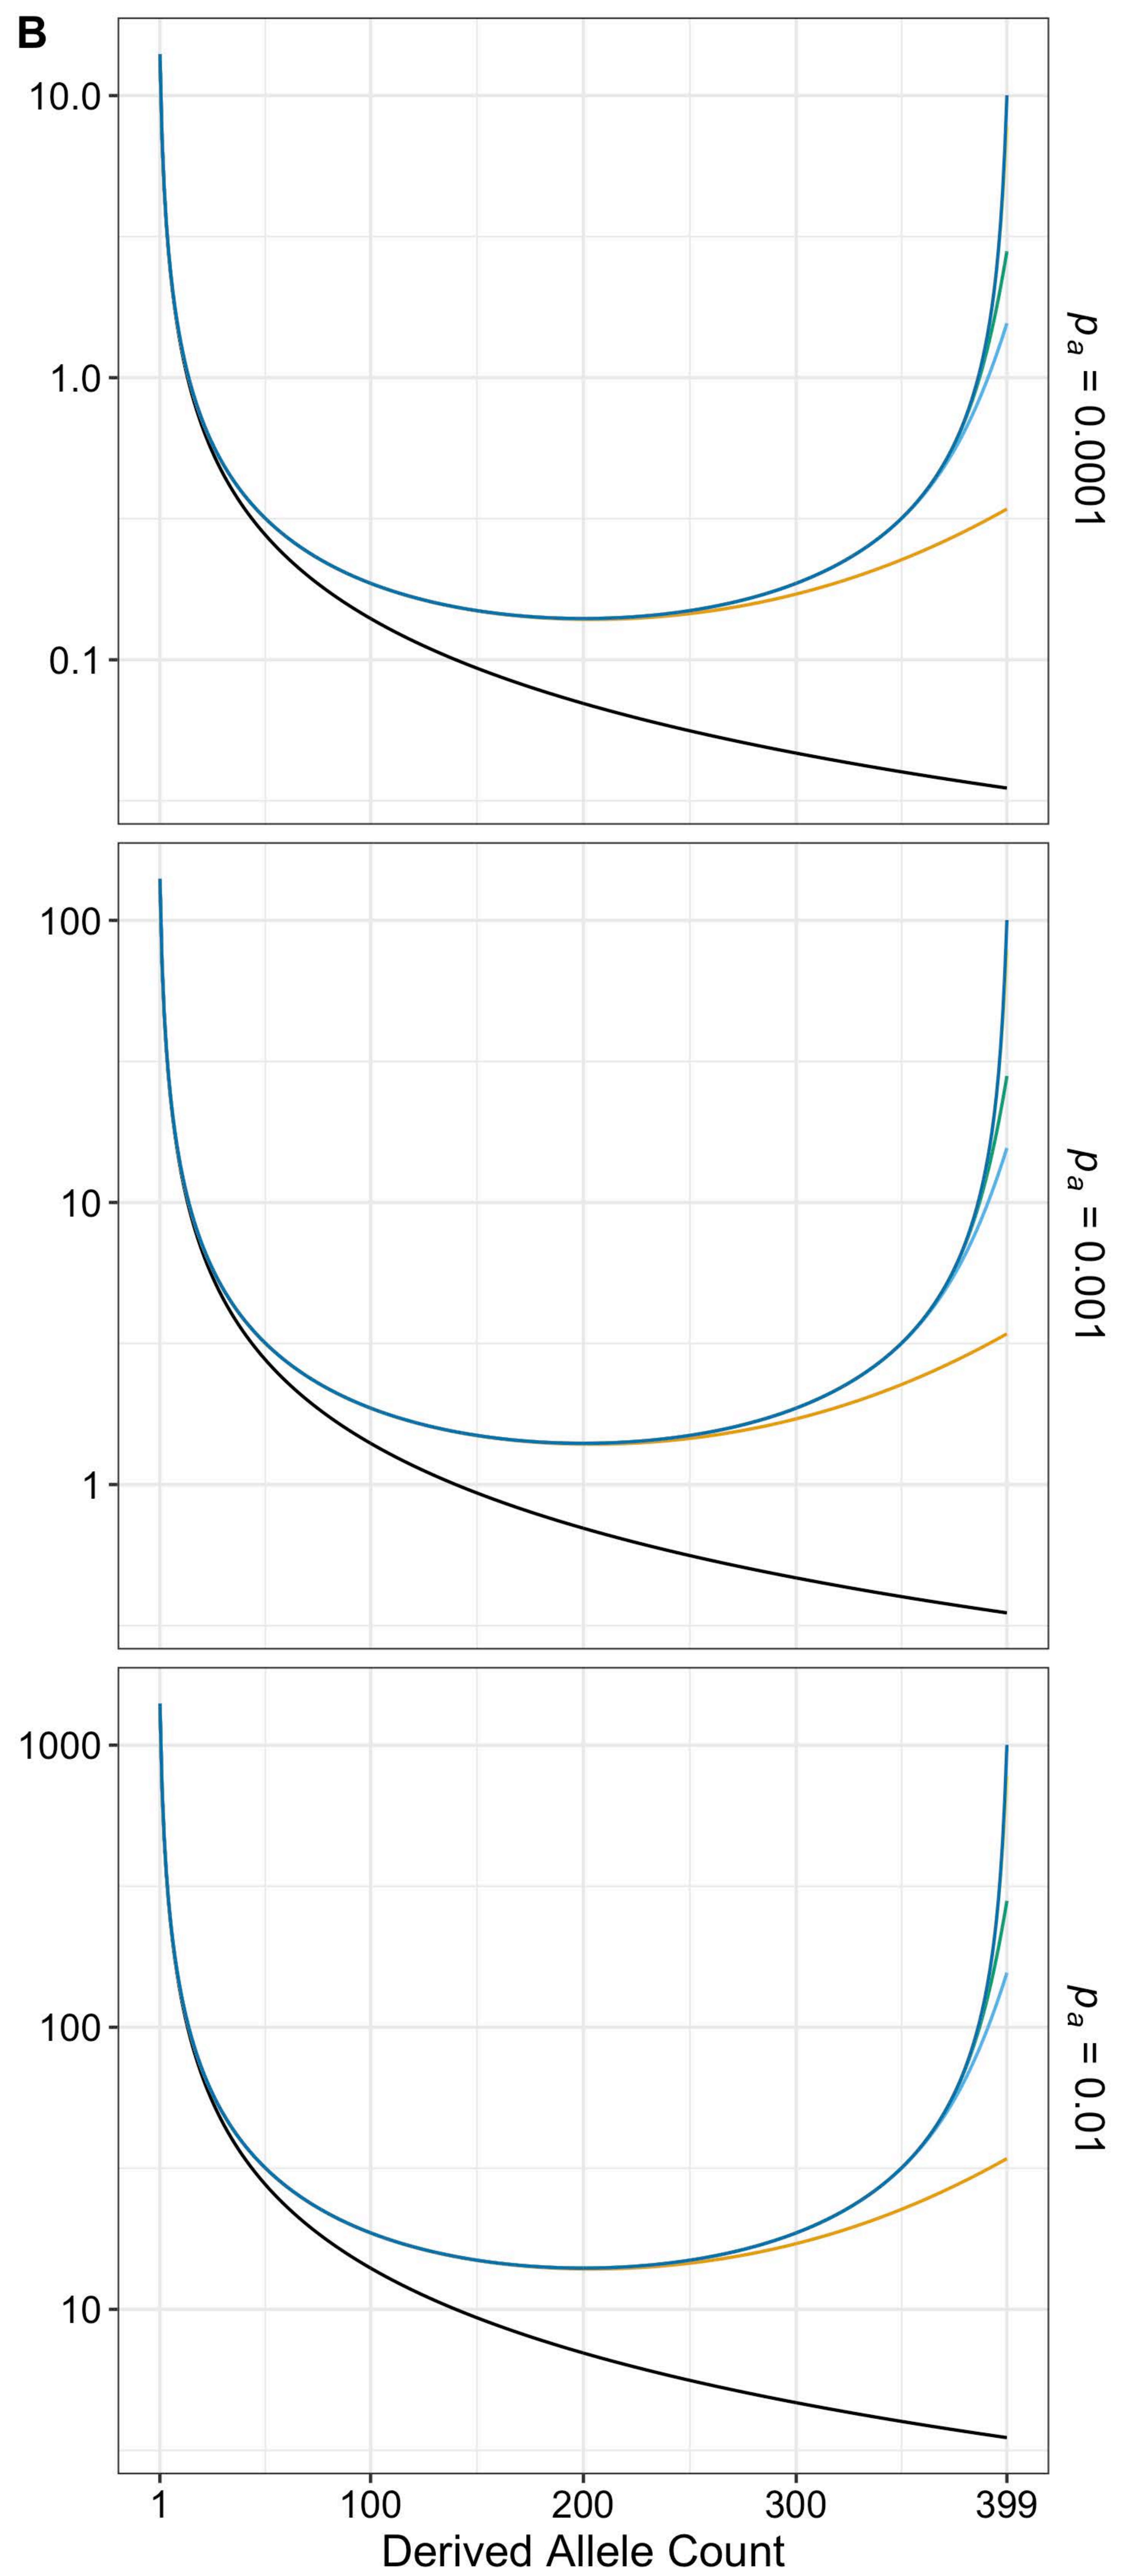

$\gamma_a$

|      |       |        |
|------|-------|--------|
| — 0  | — 50  | — 500  |
| — 10 | — 100 | — 1000 |

Supplement: Supplementary file 3 [file 1]

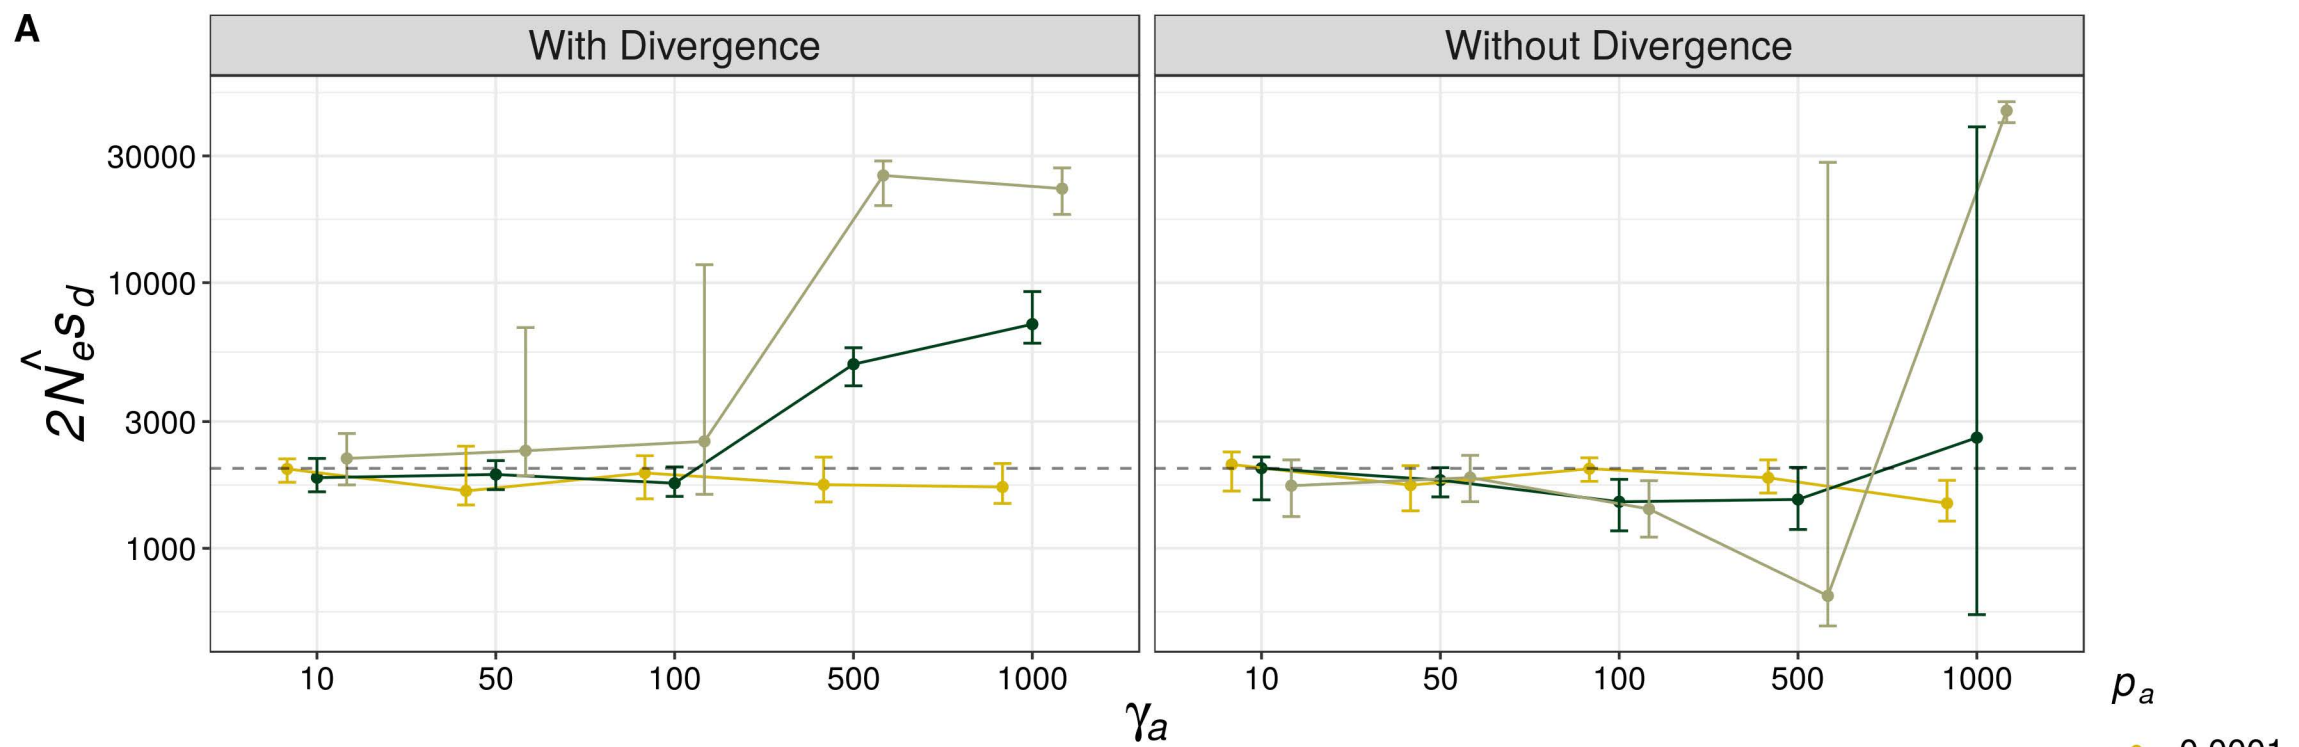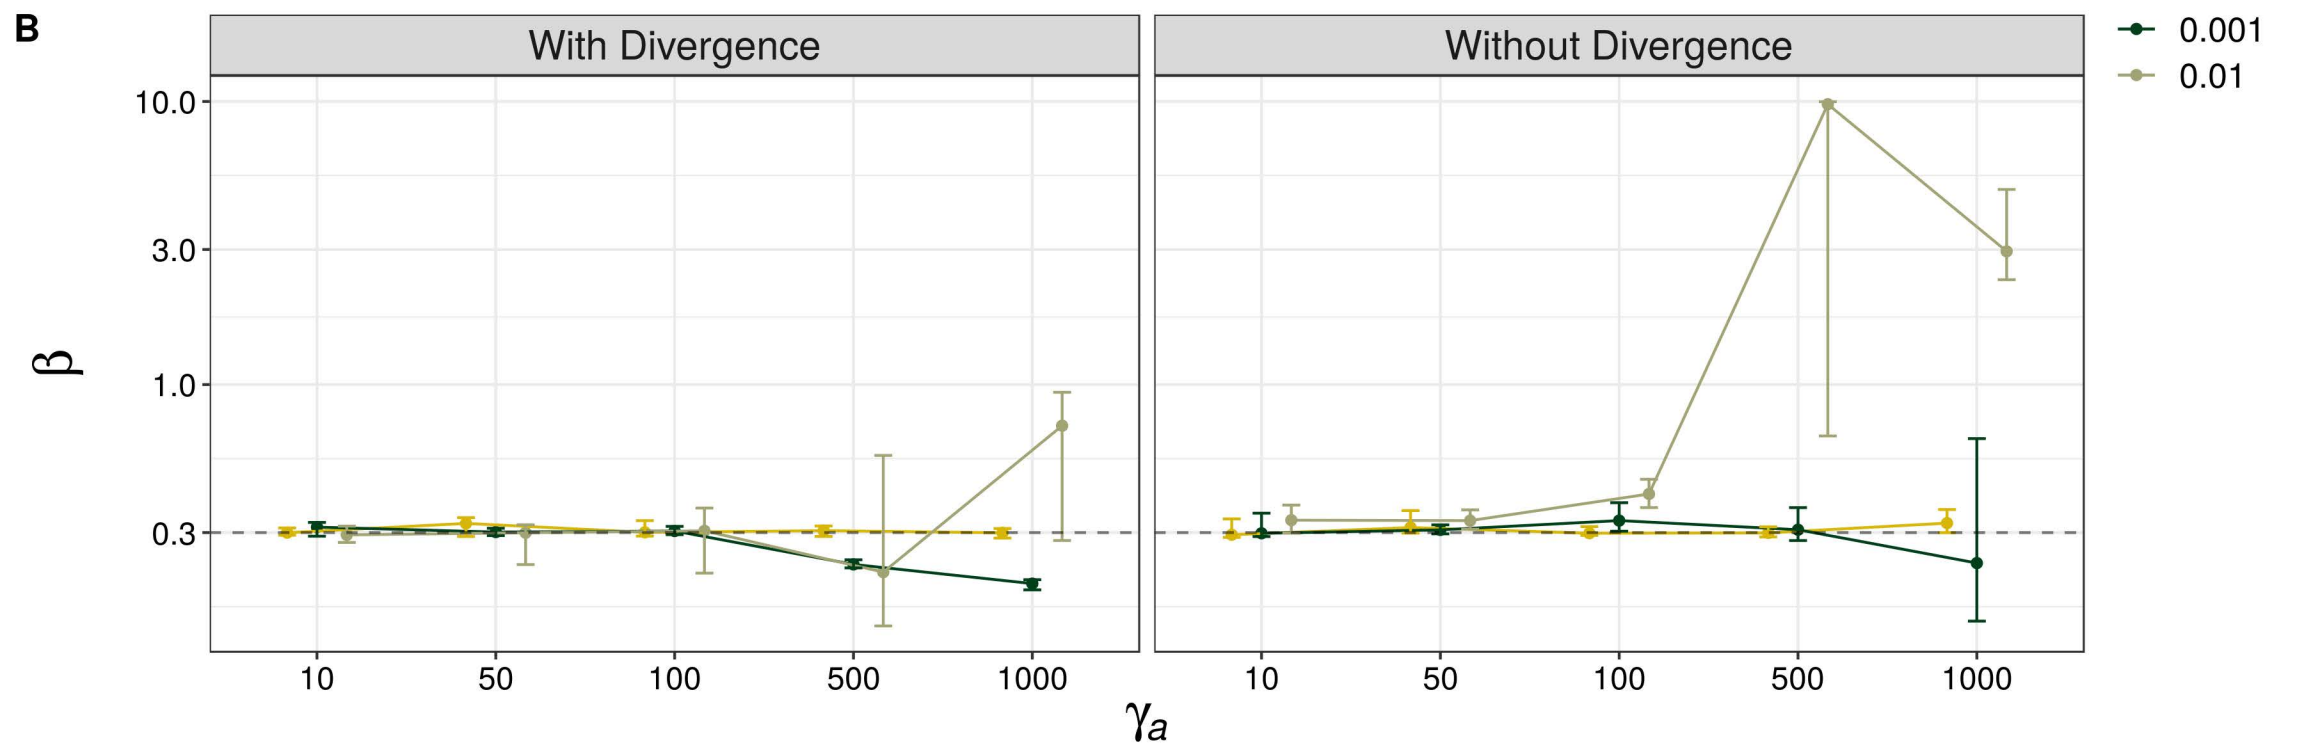

Supplement: Supplementary file 4 [file 1]
